# Supplementary material
Source: PubMed Central journal article supplement (PMC8111159)
Supplement: JCM.02489-20-s0002.pdf [file JCM.02489-20-s0002.pdf]

Table S2. 3Flex intra-assay reproducibility testing of 1 negative and 3 positive (STRONG, INTERMEDIATE, WEAK) patient samples in 5 replicates vs. ARCHITECT™ SARS-CoV-2 IgG.

| Sample                     | S<br>MFIs    | RBD<br>MFIs  | NP<br>MFIs   | 3Flex<br>Interpretation | Architect<br>Value | Architect<br>Interpretation |
|----------------------------|--------------|--------------|--------------|-------------------------|--------------------|-----------------------------|
| STRONG – Replicate 1       | 24837        | 10528        | 33593        | POS                     |                    |                             |
| STRONG – Replicate 2       | 23593        | 9825         | 32798        | POS                     |                    |                             |
| STRONG – Replicate 3       | 26243        | 10912        | 35643        | POS                     | 7.81               | POS                         |
| STRONG – Replicate 4       | 24192        | 9935         | 32625        | POS                     |                    |                             |
| STRONG – Replicate 5       | 24998        | 10347        | 35678        | POS                     |                    |                             |
| <b>Average</b>             | <b>24773</b> | <b>10309</b> | <b>34067</b> |                         |                    |                             |
| <b>Standard deviation</b>  | <b>993</b>   | <b>444</b>   | <b>1499</b>  |                         |                    |                             |
| INTERMEDIATE – Replicate 1 | 1421         | 1286         | 25505        | POS                     |                    |                             |
| INTERMEDIATE – Replicate 2 | 1402         | 1292         | 25195        | POS                     |                    |                             |
| INTERMEDIATE – Replicate 3 | 1412         | 1272         | 25621        | POS                     | 5.44               | POS                         |
| INTERMEDIATE – Replicate 4 | 1283         | 1128         | 25206        | POS                     |                    |                             |
| INTERMEDIATE – Replicate 5 | 1355         | 1195         | 25609        | POS                     |                    |                             |
| <b>Average</b>             | <b>1375</b>  | <b>1235</b>  | <b>25427</b> |                         |                    |                             |
| <b>Standard deviation</b>  | <b>57</b>    | <b>71</b>    | <b>212</b>   |                         |                    |                             |
| WEAK – Replicate 1         | 1969         | 574          | 5843         | POS                     |                    |                             |
| WEAK – Replicate 2         | 1738         | 554          | 5330         | POS                     |                    |                             |
| WEAK – Replicate 3         | 1494         | 505          | 4893         | POS                     | 2.61               | POS                         |
| WEAK – Replicate 4         | 1563         | 528          | 5174         | POS                     |                    |                             |
| WEAK – Replicate 5         | 1574         | 488          | 4887         | POS                     |                    |                             |
| <b>Average</b>             | <b>1668</b>  | <b>530</b>   | <b>5225</b>  |                         |                    |                             |
| <b>Standard deviation</b>  | <b>191</b>   | <b>35</b>    | <b>394</b>   |                         |                    |                             |
| NEG – Replicate 1          | 137          | 90           | 678          | NEG                     |                    |                             |
| NEG – Replicate 2          | 139          | 110          | 793          | NEG                     |                    |                             |
| NEG – Replicate 3          | 144          | 109          | 656          | NEG                     | 0.24               | NEG                         |
| NEG – Replicate 4          | 147          | 119          | 741          | NEG                     |                    |                             |
| NEG – Replicate 5          | 140          | 93           | 743          | NEG                     |                    |                             |
| <b>Average</b>             | <b>141</b>   | <b>104</b>   | <b>722</b>   |                         |                    |                             |
| <b>Standard deviation</b>  | <b>4</b>     | <b>12</b>    | <b>55</b>    |                         |                    |                             |
| MFI Cut-Off                | 583          | 182          | 2455         |                         |                    |                             |
